# Supplementary material
Source: MDPI journal article supplement (https://www.mdpi.com/2673-9976/31/1/25)

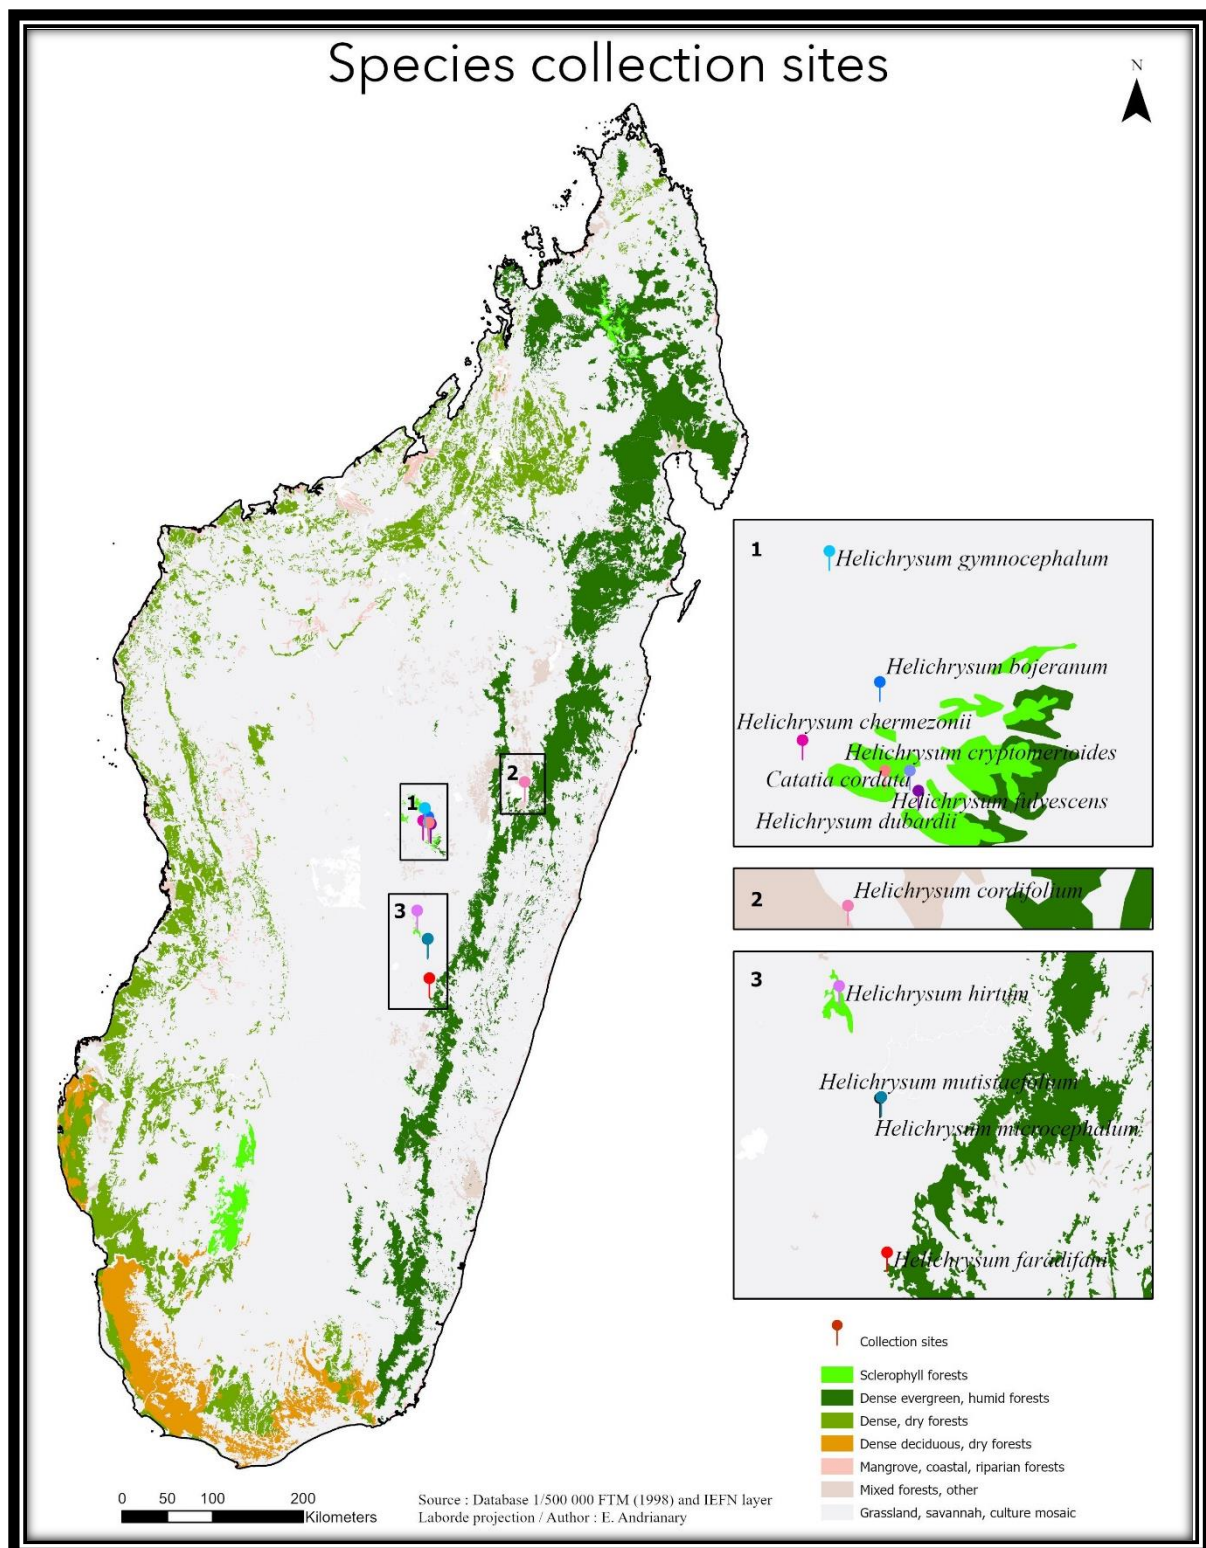

Figure S1 : Species collection sites

Supplement: s1 [file s1]
